# Supplementary material for: Comparison of Walking Quality Variables between End-Stage Osteonecrosis of Femoral Head Patients and Healthy Subjects by a Footscan Plantar Pressure System
Source: MDPI journal article supplement (doi:10.3390/medicina59010059), 2022-12-28
Supplement: s1 [file s1]

**Table S1** Static plantar pressure on the left and right side of the healthy group

| Variables    | Left       | Right      | <i>p</i> Value |
|--------------|------------|------------|----------------|
| Forefoot (%) | 21.49±2.82 | 19.88±3.25 | 0.07           |
| Hindfoot (%) | 29.87±3.64 | 29.32±3.33 | 0.62           |
| Total (%)    | 51.36±4.45 | 48.67±4.45 | 0.10           |

**Table S2** Dynamic plantar pressure distribution on the left and right side of the healthy group

| Variables                | Left       | Right      | <i>p</i> Value |
|--------------------------|------------|------------|----------------|
| T1(N/cm <sup>2</sup> )   | 6.33±2.42  | 6.06±3.37  | 0.60           |
| T2-5(N/cm <sup>2</sup> ) | 2.37±1.80  | 2.13±1.52  | 0.28           |
| M1(N/cm <sup>2</sup> )   | 7.12±3.58  | 7.31±4.22  | 0.82           |
| M2(N/cm <sup>2</sup> )   | 13.28±3.76 | 13.35±4.05 | 0.91           |
| M3(N/cm <sup>2</sup> )   | 17.51±5.18 | 16.65±5.35 | 0.16           |
| M4(N/cm <sup>2</sup> )   | 11.60±4.40 | 10.70±4.97 | 0.07           |
| M5(N/cm <sup>2</sup> )   | 7.17±4.69  | 6.34±4.74  | 0.06           |
| MF(N/cm <sup>2</sup> )   | 4.53±1.73  | 4.03±1.50  | 0.06           |
| HM(N/cm <sup>2</sup> )   | 9.96±2.28  | 10.69±3.31 | 0.20           |
| HL(N/cm <sup>2</sup> )   | 10.22±3.22 | 9.58±2.85  | 0.26           |

**Table S3** Regional impulse percentage (%) on the left and right side of the healthy group

| Variables | Left       | Right      | <i>p</i> Value |
|-----------|------------|------------|----------------|
| T1(%)     | 6.2±4.46   | 5.88±3.66  | 0.74           |
| T2-5(%)   | 1.46±1.43  | 1.22±1.05  | 0.37           |
| M1(%)     | 6.63±3.71  | 7.29±3.40  | 0.06           |
| M2(%)     | 12.33±3.05 | 13.39±3.44 | 0.07           |
| M3(%)     | 13.01±3.64 | 12.63±3.73 | 0.56           |
| M4(%)     | 9.29±3.29  | 8.68±3.42  | 0.44           |
| M5(%)     | 7.38±3.91  | 6.27±3.58  | 0.05           |
| MF(%)     | 18.68±7.72 | 17.61±8.30 | 0.08           |
| HM(%)     | 13.50±4.13 | 15.18±4.37 | 0.06           |
| HL(%)     | 11.43±3.53 | 12.27±3.89 | 0.35           |

**Table S4** Regional contact area percentage (%) on the left and right side of the healthy group

| Variables | Left       | Right      | <i>p</i> Value |
|-----------|------------|------------|----------------|
| T1(%)     | 10.53±1.76 | 9.90±2.28  | 0.28           |
| T2-5(%)   | 7.24±3.29  | 7.24±3.29  | 0.67           |
| M1(%)     | 7.54±1.22  | 8.31±2.61  | 0.15           |
| M2(%)     | 6.93±0.51  | 7.42±1.49  | 0.09           |
| M3(%)     | 5.65±0.44  | 5.98±1.06  | 0.10           |
| M4(%)     | 5.69±0.51  | 5.92±0.95  | 0.26           |
| M5(%)     | 7.54±1.13  | 7.11±1.56  | 0.20           |
| MF(%)     | 28.12±2.87 | 27.03±3.97 | 0.29           |
| HM(%)     | 11.26±1.27 | 11.66±1.35 | 0.32           |
| HL(%)     | 9.50±1.14  | 9.93±0.99  | 0.16           |
